# Supplementary material for: Dynamic Risk Stratification for Predicting Treatment Response in Differentiated Thyroid Cancer
Source: MDPI journal article supplement (doi:10.3390/jcm9092708), 2020-08-21
Supplement: s1 [file s1]

**Table S1.** Assay methodology

| Analyte           | Name<br>(Manufacturer, location)                                                     | FAS or LLD            | Intra-assayCV <sup>a</sup> | Inter-assayCV <sup>a</sup> |
|-------------------|--------------------------------------------------------------------------------------|-----------------------|----------------------------|----------------------------|
| Tg <sup>b</sup>   |                                                                                      |                       |                            |                            |
| <i>PGH</i>        | B·R·A·H·M·S Tg-pluS RIA,<br>Thermo Scientific<br>Biomarkers, Hennigsdorf,<br>Germany | 0.3 µg/L <sup>c</sup> | 1.0%–13.9%                 | 1.1%–21.0%                 |
| <i>CHT</i>        | B·R·A·H·M·S TgS RIA,<br>Thermo Scientific<br>Biomarkers, Hennigsdorf,<br>Germany     | 0.1 µg/L <sup>c</sup> | 0.9%–2.9%                  | 2.2%–3.6%                  |
| TgAb <sup>c</sup> |                                                                                      |                       |                            |                            |
| <i>PGH</i>        | B·R·A·H·M·S Tn RIA,<br>Thermo Scientific<br>Biomarkers, Hennigsdorf,<br>Germany      | 0.1 IU/mL             | 2.0%–7.5%                  | 3.1%–5.5%                  |
| <i>CHT</i>        | Dia Source TG AB, RIA<br>R-CI-100, Louvain-la-Neuve – Belgium                        | 6 IU/mL               | 1.6%–4.9%                  | 2.1%–6.3%                  |
| Anti-TPO          |                                                                                      |                       |                            |                            |
| <i>PGH</i>        | B·R·A·H·M·S anti-TPOn<br>Thermo Scientific<br>Biomarkers, Hennigsdorf,<br>Germany    | 5.0 IU/mL             | 1.9%–4.8%                  | 3.7%–9.1%                  |
| <i>CHT</i>        | Dia Source TPO AB, RIA<br>R-CO-100, Louvain-la-Neuve – Belgium                       | 1.3 IU/mL             | 2.7%–5.5%                  | 4.2%–9.5%                  |

*PGH*, Papageorgiou Hospital, *CHT*, Cancer Hospital Theagenio, Anti-TPO, anti-thyroperoxidase autoantibodies; CV, coefficient of variation; FAS, functional assay sensitivity; LLD, lower limit of detection; Tg, thyroglobulin; TgAb, anti-thyroglobulin autoantibodies. <sup>a</sup> CVs depended on analyte level or antibody titre. <sup>b</sup> Tg assays were calibrated to the Certified Reference Material-457 standard. <sup>c</sup> The interfering cut-off of TgAb was 20IU/ml

**Table S2.** Reference values for TgAb <sup>a</sup>

| TgAb value  | Interpretation                            |
|-------------|-------------------------------------------|
| >30 IU/ml   | Negative for Thyroglobulin autoantibodies |
| 30–70 IU/ml | Limit                                     |
| >70 IU/ml   | Positive for Thyroglobulin autoantibodies |

<sup>a</sup> Values reported above are indicated by the manufacturer who recommends that each laboratory determines its own reference interval.
